# Supplementary material
Source: PubMed Central journal article supplement (PMC3730252)
Supplement: NIHMS90091-supplement-Fig__1_and_Leg.pdf [file NIHMS90091-supplement-Fig__1_and_Leg.pdf]

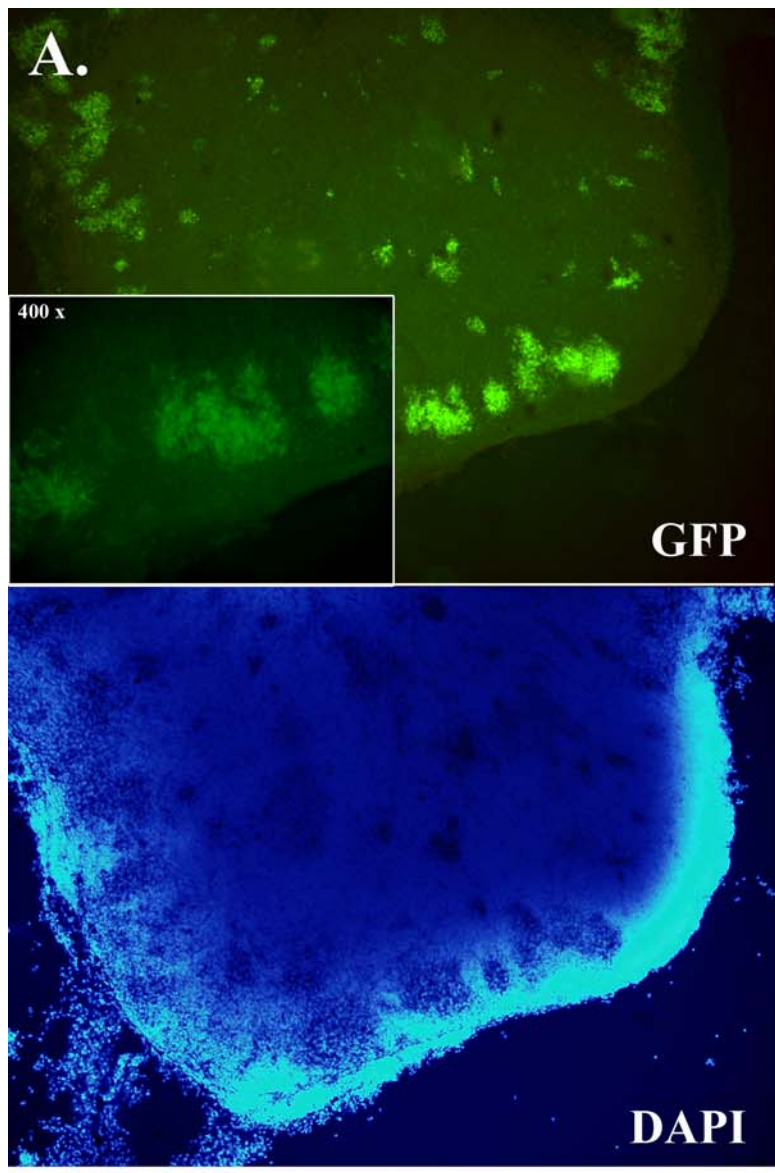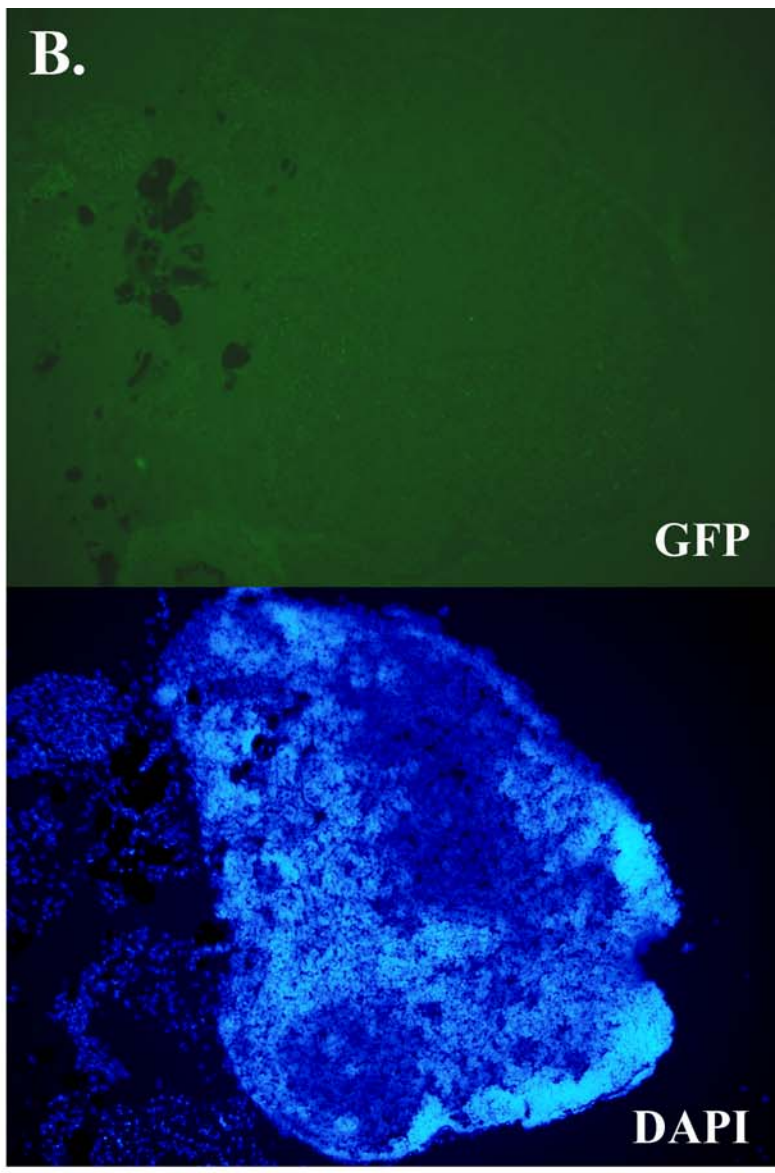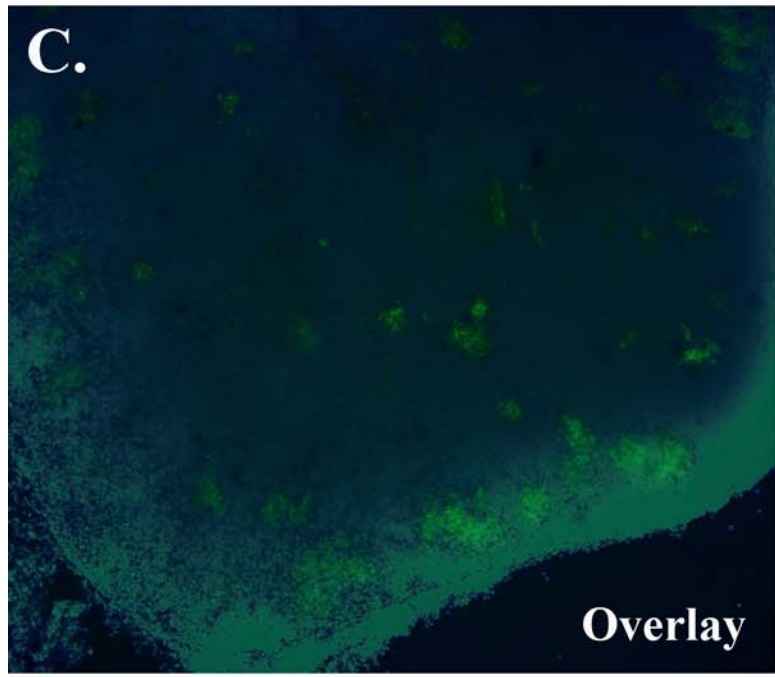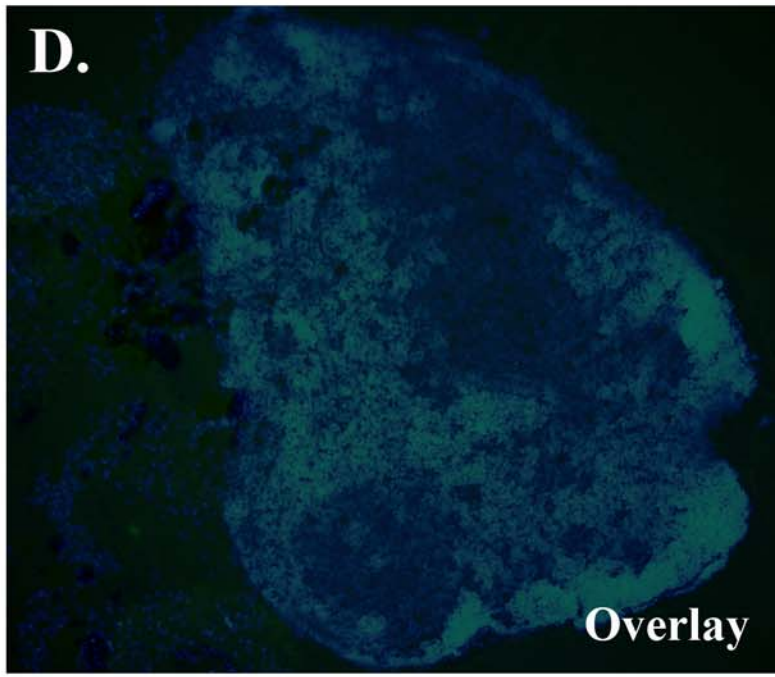

Supplemental Figure 1

**Supplemental Figure 1. (online supplement) Forty-eight hours after intranasal transfer DC are detectable in the mediastinal lymph nodes.**

Bone marrow derived DC were prepared from C57BL/6J GFP mice. Five  $\times 10^5$  cells were adoptively transferred by intranasal administration into WT Th2 polarized, OVA sensitized C57BL/6J mice (day 14), similar to the procedure outlined in Fig 4A. Forty-eight hours following the transfer (day 16), the mediastinal lymph nodes were harvested and analyzed by fluorescent microscopy. Compared to controls (B and D), there was clear accumulation of GFP-positive DC in the regional lymph nodes of mice that received GFP-positive DC (A and C).
